# Supplementary material
Source: PubMed Central journal article supplement (PMC4863950)

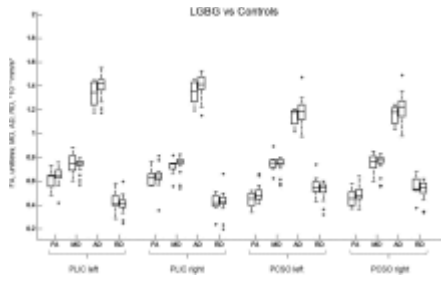

Supplement: NIHMS781665-supplement-Tables.pdf [file NIHMS781665-supplement-Tables.pdf]
